# Supplementary material for: Humidity-induced formation of water channels in supramolecular assemblies of wedge-shaped amphiphiles: the effect of the molecular architecture on the channel topology
Source: Royal Society of Chemistry journal article supplement (doi:10.1039/c6cp08087a), 2017-01-01
Supplement: c6cp08087a1.pdf [file c6cp08087a1.pdf]

## Humidity-induced formation of water channels in supramolecular assemblies of wedge-shaped amphiphiles: effect of molecular geometry on channel topology

A. Dolgoplov,<sup>a</sup> K. N. Grafskaya,<sup>b</sup> D. V. Anokhin,<sup>b,c</sup> D. E. Demco,<sup>a</sup> X. Zhu,<sup>\*a</sup> D. A. Ivanov,<sup>\*b,c,d</sup> and M. Möller<sup>a</sup>

<sup>a</sup> DWI – Leibniz-Institute for Interactive Materials e.V. and Institute for Technical and Macromolecular Chemistry of RWTH Aachen University, Forckenbeckstr. 50, D-52056 Aachen, Germany

<sup>b</sup> Moscow Institute of Physics and Technology (State University), Institutskiy per. 9, Dolgoprudny, 141700, Russia

<sup>c</sup> Lomonosov Moscow State University, Faculty of Fundamental Physical and Chemical Engineering, GSP-1, 1-51 Leninskie Gory, Moscow, 119991, Russia.

<sup>d</sup> Institut de Science de Matériaux de Mulhouse (IS2M-CNRS), CNRS UMR 7361, 15 rue Jean Starcky, F-68057 Mulhouse, France

### Supporting information

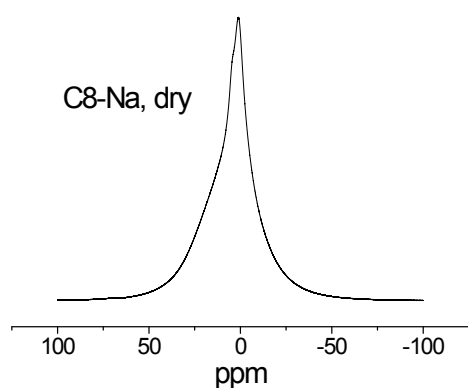

(a)

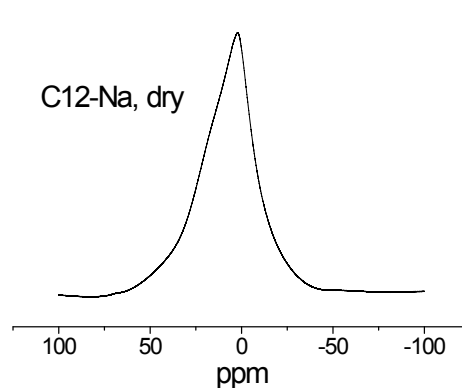

(f)

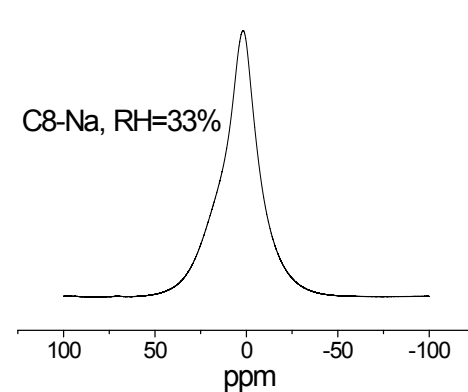

(b)

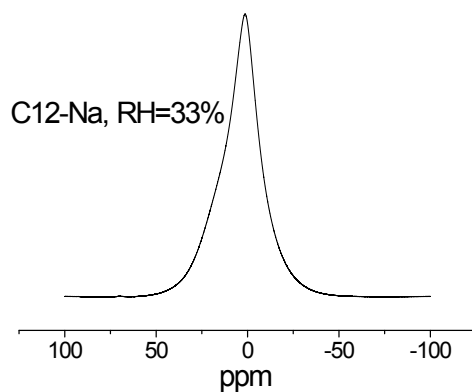

(g)

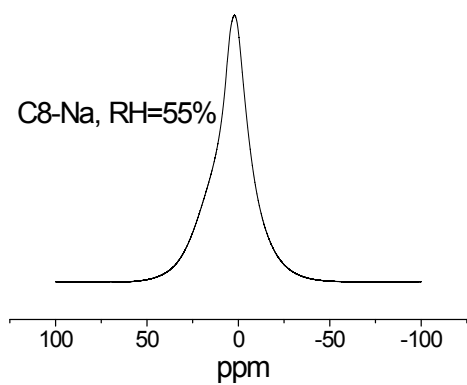

(c)

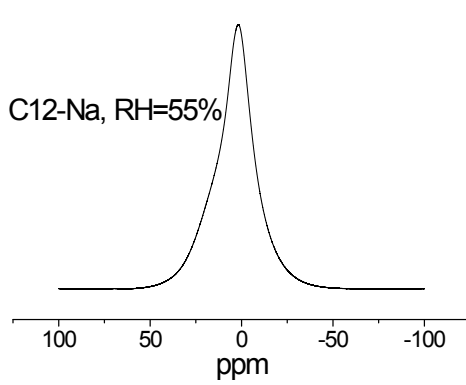

(h)

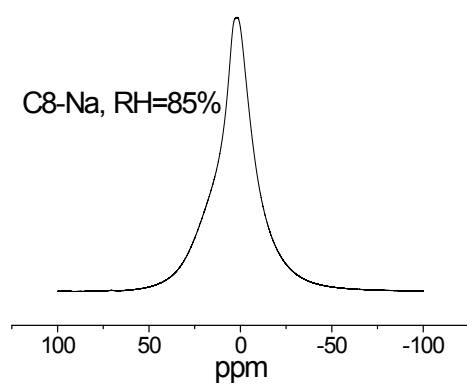

(d)

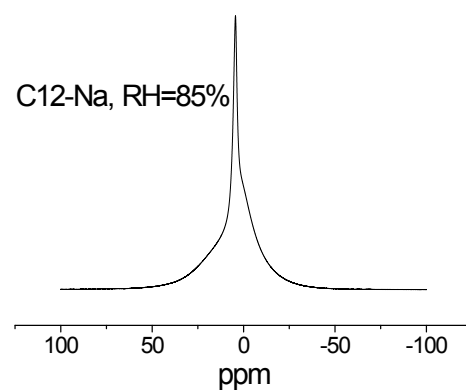

(i)

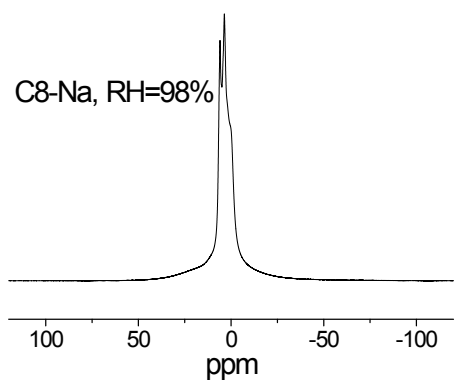

(e)

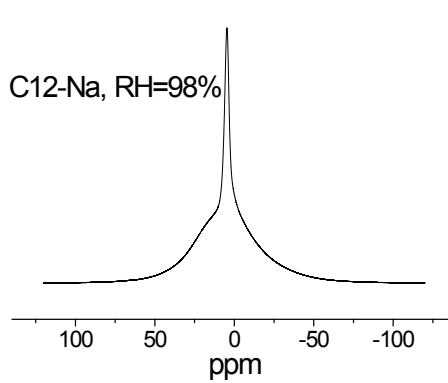

(j)

Figure 1s. Static-solid-state  $^1\text{H}$  NMR spectra of C8-Na and C12-Na measured at 23 °C and different relative humidity (RH).

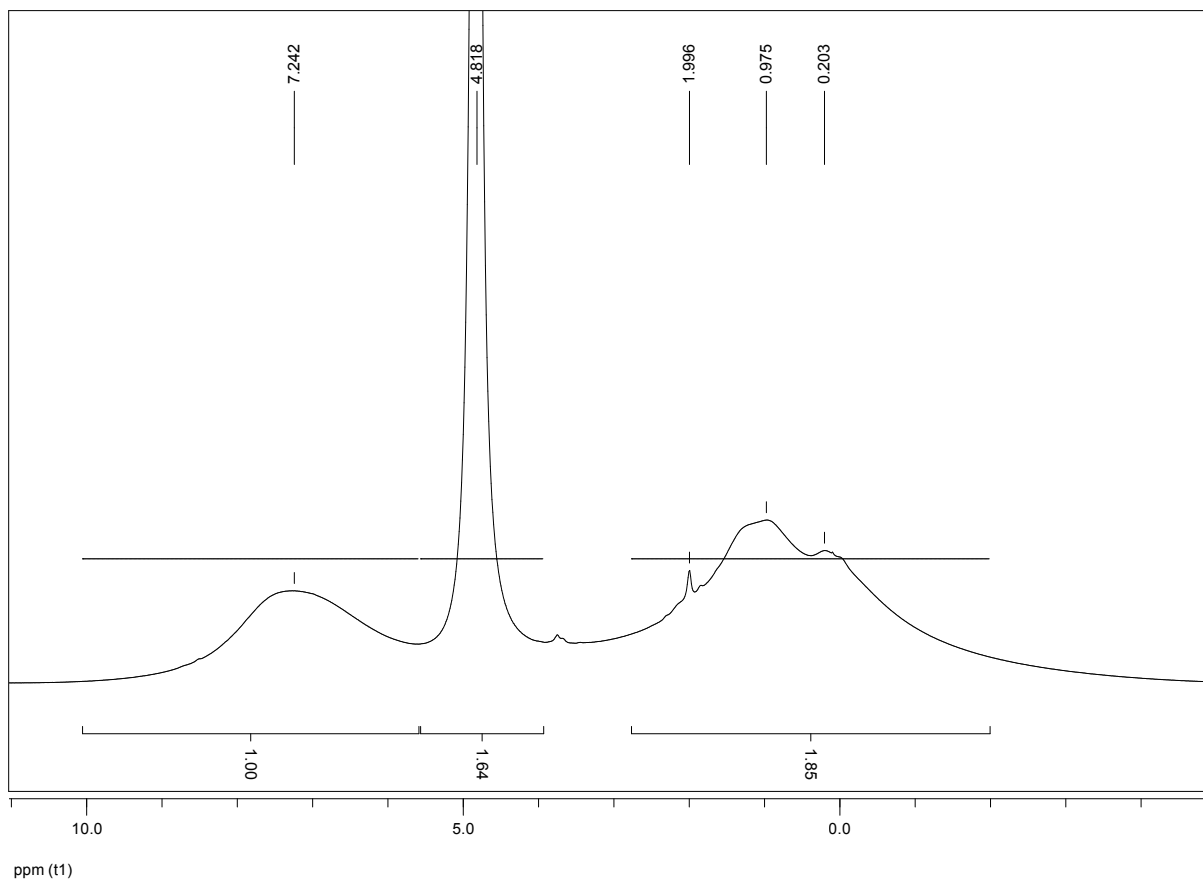

Figure 2s. Solid-state  $^1\text{H}$  spectrum of C8-Na at 23 °C and RH 98% measured under magic angle spinning at 10 kHz.

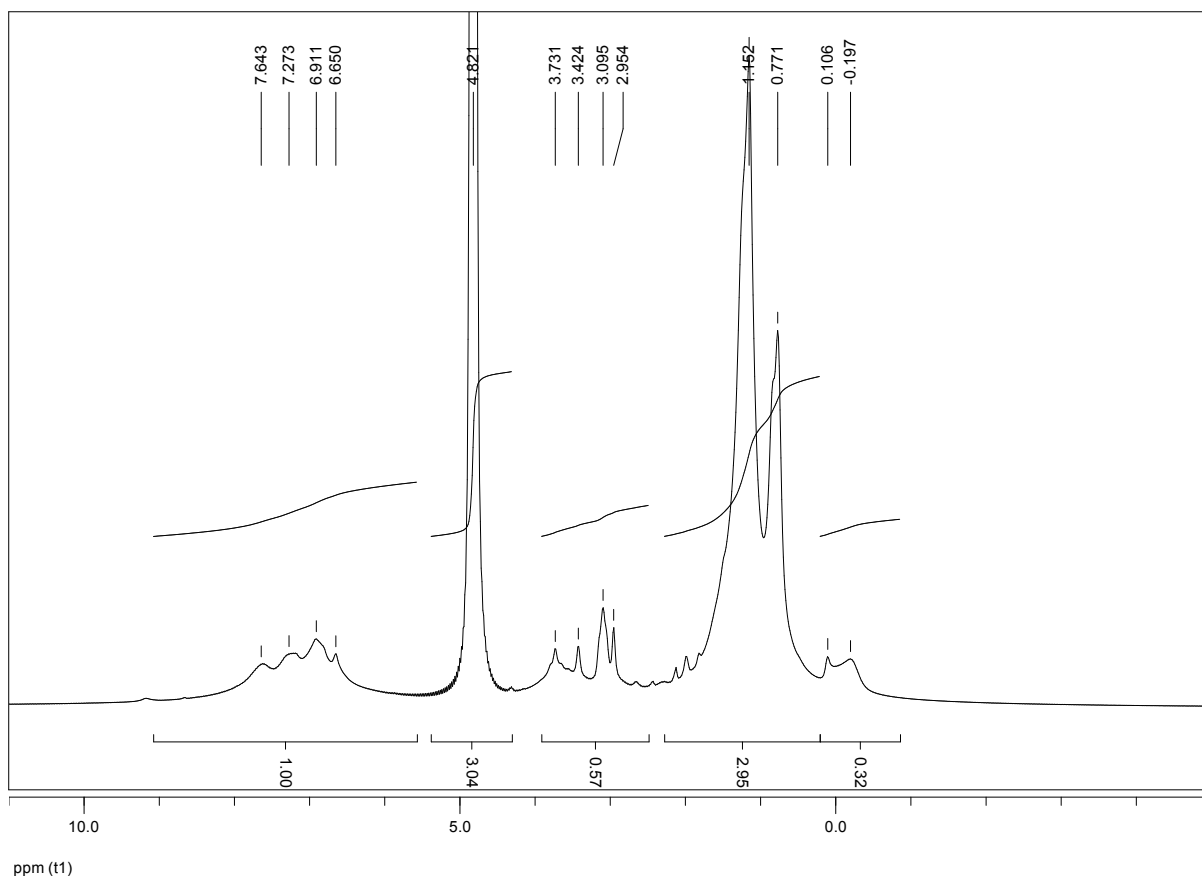

Figure 3s. Solid-state  $^1\text{H}$  spectrum of C12-Na at 23 °C and RH 98% measured under magic angle spinning at 10 kHz.

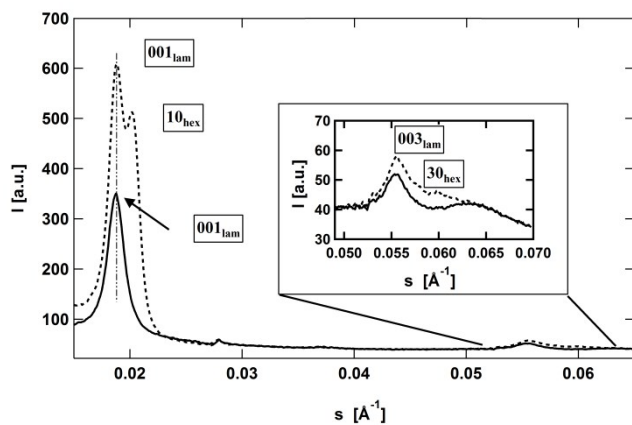

Figure 4s. 1D GISAXS patterns calculated from the corresponding 2D patterns in Figure 6. The reflexes of the lamellar and hexagonal columnar phase are indicated.

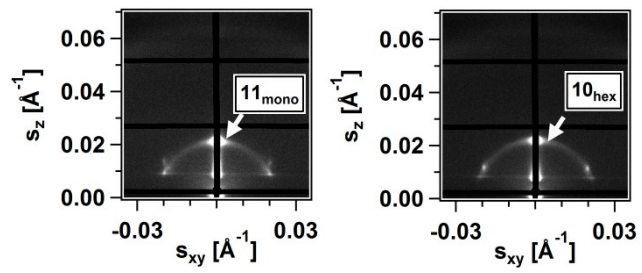

Figure 5s. 2D GISAXS patterns corresponding to heating of a thin film of C12-Na. The patterns correspond to 100 (left) and 200 °C (right). The characteristic peaks of the monoclinic columnar and hexagonal columnar phase are shown.
